# Supplementary material
Source: PubMed Central journal article supplement (PMC1978085)

Figure S1 Bejarano et al

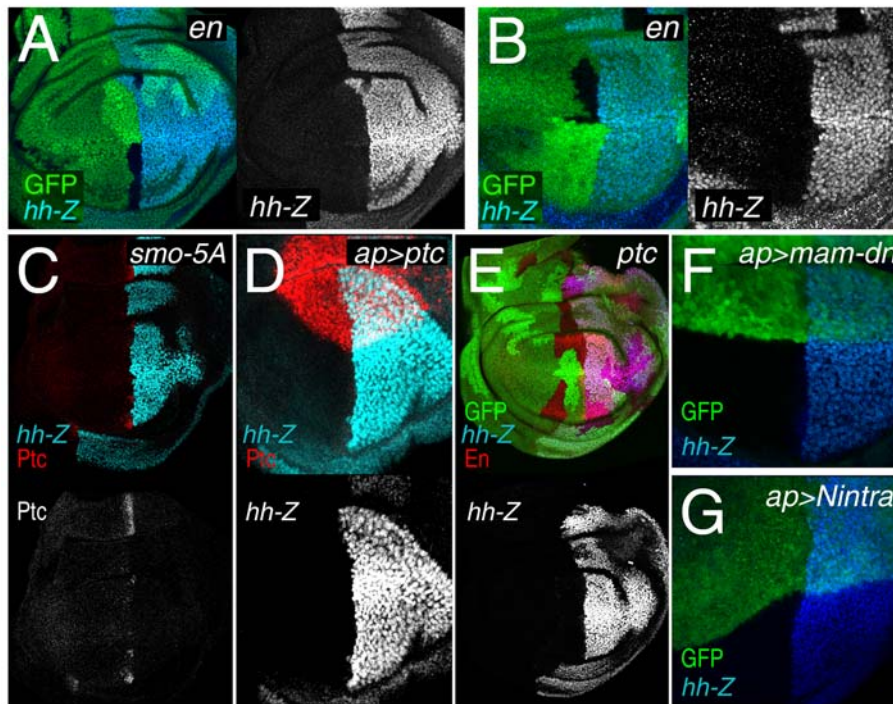

Supplement: 7401003-s2.pdf [file 7401003-s2.pdf]

Figure S2 Bejarano et al

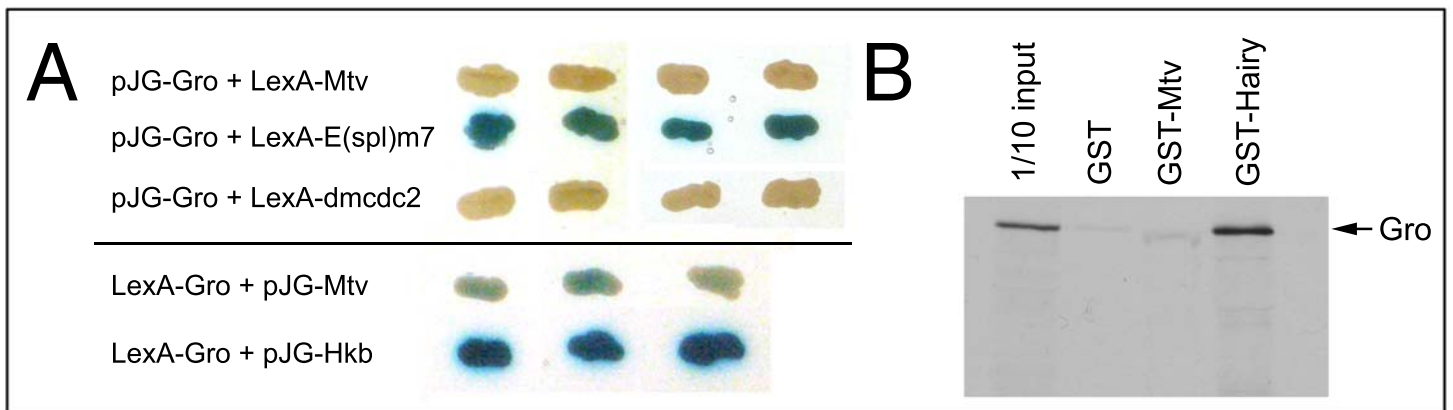

Supplement: 7401003-s3.pdf [file 7401003-s3.pdf]
